1 **OperonSEQer: A set of machine-learning algorithms with threshold voting for detection of**  
2 **operon pairs using short-read RNA-sequencing data**

3

4 Raga Krishnakumar<sup>1\*</sup> and Anne M. Ruffing<sup>2</sup>

5

6 1. Systems Biology Department, Sandia National Laboratories, Livermore, CA 94551. USA

7 2. Biological Sciences and Engineering Department, Sandia National Laboratories, Albuquerque, NM 87185.

8 USA

9 \* Correspondence to [rkrishn@sandia.gov](mailto:rkrishn@sandia.gov)

10

11 **Abstract**

12 Operon prediction in prokaryotes is critical not only for understanding the regulation of  
13 endogenous gene expression, but also for exogenous targeting of genes using newly developed  
14 tools such as CRISPR-based gene modulation. A number of methods have used transcriptomics  
15 data to predict operons, based on the premise that contiguous genes in an operon will be  
16 expressed at similar levels. While promising results have been observed using these methods,  
17 most of them do not address uncertainty caused by technical variability between experiments,  
18 which is especially relevant when the amount of data available is small. In addition, many existing  
19 methods do not provide the flexibility to determine whether the stringency with which genes  
20 should be evaluated for being in an operon pair. We present OperonSEQer, a set of machine  
21 learning algorithms that uses the statistic and p-value from a non-parametric analysis of variance  
22 test (Kruskal-Wallis) to determine the likelihood that two adjacent genes are expressed from the  
23 same RNA molecule. We implement a voting system to allow users to choose the stringency of  
24 operon calls depending on whether your priority is high coverage of operons or high accuracy of  
25 the calls. In addition, we provide the code so that users can retrain the algorithm and re-establish  
26 hyperparameters based on any data they choose, allowing for this method to be expanded on as  
27 additional data is generated and incorporated. We show that our approach detects operon pairs  
28 that are missed by current methods by comparing our predictions to publicly available long-read  
29 sequencing data. OperonSEQer therefore improves on existing methods in terms of accuracy,  
30 flexibility and adaptability.

## 31 **Author Summary**

32 Bacteria and archaea, single-cell organisms collectively known as prokaryotes, live in all  
33 imaginable environments and comprise the majority of living organisms on this planet.  
34 Prokaryotes play a critical role in the homeostasis of multicellular organisms (such as animals and  
35 plants) and ecosystems. In addition, bacteria can be pathogenic, and cause a variety of diseases  
36 in these same hosts and ecosystems. In short, understanding the biology and molecular functions  
37 of bacteria and archaea and devising mechanisms to engineer and optimize their properties are  
38 critical scientific endeavors with significant implications in healthcare, agriculture, manufacturing  
39 and climate science among others. One major molecular difference between unicellular and  
40 multicellular organisms is the way they express genes – rather than making individual RNA  
41 molecules like multicellular organisms, prokaryotes express genes in long contiguous RNA  
42 molecules known as operons, which are subsequently processed. Understanding which genes  
43 exist within operons is critical for elucidating basic biology and for engineering organisms. In this  
44 work, we use a combination of statistical and machine learning-based methods to use next-  
45 generation sequencing data to predict operon structure across a range of prokaryotes. Our  
46 method provides an easily implemented, robust, accurate and flexible way to determine operon  
47 structure in an organism-agnostic manner using readily-available data.

48

## 49 **Introduction**

50 Bacteria often transcribe functionally related genes not as single units but as contiguous  
51 RNA molecules (i.e., operons) - these molecules are under the control of a single promoter,  
52 allowing them to be co-expressed when required<sup>1-6</sup>. While there are a number of well-  
53 characterized operons and operon prediction methods in the literature, qPCR and more recently,  
54 deep sequencing technology, are revealing novel, previously uncharacterized operons in many  
55 bacterial species<sup>7,8</sup>.

56

57 Existing operon predictions often show high precision and accuracy for well-annotated  
58 organisms, but many of them require information about gene function and conservation<sup>9-12</sup>.  
59 Newer methods include the use of visual representations of the genome to categorize operons<sup>13</sup>.

60 A drawback of some of these approaches is the challenge in incorporating empirical real-world  
61 data regarding operon structure, which is constantly being generated and evolving our  
62 understanding and cataloging of operons. It is therefore imperative to couple methods based on  
63 existing genomic information with data-based predictions.

64

65         Recent work has shown that using RNA-sequencing (RNA-seq) data can significantly help  
66 increase the accuracy of operon prediction<sup>14-19</sup>. While this previous work is critical for the  
67 advancement of the understanding of operon biology as it demonstrates the usability of RNA-  
68 seq data in this context, there is still a gap in the technology with respect to software that is both  
69 broadly-applicable across experimental conditions and species, but also flexible in allowing the  
70 user to decide whether catching the highest number of operon pairs (high recall) or being very  
71 discerning (high precision) is most important. We believe that an approach that leverages not  
72 raw signal in RNA-seq data (which is highly variable and prone to batch effects), but rather uses  
73 statistics to determine the distribution of signal across two genes and an intergenic region  
74 provides a broader approach to operon prediction that can be used across a range of data sets  
75 and species. In addition, using multiple methods, and tallying the results gives the opportunity  
76 for a voting system that can give the user flexibility in what they decide to call a relevant operon  
77 pair. It is also increasingly clear that careful characterization of the resulting predictions against  
78 long-read-confirmed operons is necessary to truly evaluate the performance of a model, which  
79 is a technological opportunity that has recently arisen. And since novel data will continue to be  
80 generated, both using long- and short-read sequencing, it is necessary to provide the code to re-  
81 train and re-evaluate any method developed as this novel data emerges. To continue the work  
82 established by these studies and show that individual RNA-seq experiments can be sufficient for  
83 operon calls, we developed an operon prediction method, trained using a range of RNA-seq data  
84 from different organisms with a range of GC-content, to predict operon structure from a single  
85 set of RNA-seq data for two adjacent genes from data that has never been seen by the algorithm.  
86 Our approach addresses the issue of variability between RNA-seq data sets without requiring two  
87 or more matched experimental conditions, or any information about gene function, thereby  
88 building on and advancing the current state of the art in operon prediction. Our method also

89 seeks to address the challenge of normalizing and featurizing the sequencing data to makes it  
90 generalizable across experiments without any prerequisites.

91

92 Operon-SEQer uses a non-parametric statistical test (chosen since the data is not  
93 necessarily normally distributed) to obtain the likelihood that the RNA-seq signal coverage across  
94 two genes and the intergenic region come from the same distribution. Our hypothesis is that the  
95 result of this statistical test, along with intergenic distance, is accurately predictive of an operon  
96 pair from any short-read RNA-seq data set, and we demonstrate this using a set of machine  
97 learning algorithms trained on existing data. We also show that using this method to identify  
98 operons in previously unseen organisms and data sets does not significantly reduce the accuracy,  
99 while leaving open the possibility to train the models with additional data sets if necessary. We  
100 evaluate six different algorithms and show that while specificity and recall vary for each  
101 algorithm, they all perform on-par with existing operon prediction methods; By taking advantage  
102 of a mutli-algorithm method that uses a threshold voting system, we further improve on this  
103 performance. In addition, we show that Operon-SEQer identifies new operon pairs that are not  
104 found in previous standard predictions but are likely to be true operons based on empirical  
105 evidence from previously published long-read *E.coli* RNA-seq data<sup>7</sup>. Finally, we demonstrate that  
106 while Operon-SEQer can call operons based on a single data point (without replicates) of a gene  
107 pair and the intergenic region, having 2 or more replicates per gene pair greatly increases its  
108 performance. In summary, our operon calling method matches the state of the art in operon  
109 prediction by determining operon status of gene pairs with high precision and recall, and  
110 advances the state of the art by identifying new operon pairs, and by providing flexibility to the  
111 user to determine whether they want their results to favor higher recall (i.e. catch every single  
112 operon pair) or higher specificity (i.e. make sure anything called is a true positive).

113

## 114 **Results**

115

116 *Statistical analysis of features from RNA-seq data for operon prediction*

117

118 The main aims of Operon-SEQer are to predict operon status from individual data sets to produce  
119 a comprehensive list of potential operons, for these predictions to be statistically robust despite  
120 only having single data sets, and to be species-agnostic. While we acknowledge that there are  
121 species-specific differences that may affect the outcome of such an algorithm (e.g., intergenic  
122 distances are of different lengths in different organisms), our premise was that each two-way  
123 comparison of adjacent genes on the same DNA strand, regardless of any other features, was an  
124 individual data point, and that a range of algorithms could be trained on a compilation of such  
125 data points across species, conditions, and replicates. This also allowed us to have many more  
126 data points than if we had taken a gene-specific approach. To this end, we established a statistical  
127 method that determines whether the RNA-seq coverage signal across the intergene-flanking  
128 regions of two adjacent genes on the same strand is from a single distribution. Using RNA-seq  
129 signal from the gene regions directly flanking the intergenic region, as well as the intergenic  
130 region itself, a non-parametric rank test (Kruskal-Wallis) was applied to obtain both a statistic  
131 and p-value for the comparison of the coverage signal at the three regions – Gene A, Gene B and  
132 the intergenic region (Figure 1). Previous reports have shown that intergenic distance is an  
133 important factor in determining whether two genes belong to the same operon, so we used the  
134 intergenic distance as well as the Kruskal-Wallis statistic and p-value as features for calling operon  
135 gene pairs<sup>20,21</sup>.

136  
137 A challenge in using RNA-seq data to model operons, especially when users do not have the  
138 computational resources with bandwidth to train algorithms on enormous amounts of data, is  
139 having enough diversity in the input data to cover a wide range of conditions that might be  
140 relevant to your organisms of interest. Therefore, OperonSEQer was trained on a wide range of  
141 organisms and was designed to allow for user input of additional organism and RNA-seq data for  
142 customization and iterative improvement. We used publicly deposited RNA-seq data sets from 7  
143 different bacterial species (both Gram-positive and Gram-negative as well as heterotrophic and  
144 photoautotrophic): *Burkholderia pseudomallei* (*B. pseu*), *Clostridium difficile* (*C. diff*), *Escherichia*  
145 *coli* (*E. coli*), *Synechococcus* sp. PCC 7002 (*Syn. 7002*), *Synechocystis* sp. PCC 6803, *Synechococcus*  
146 *elongatus* PCC 7942 (*S. elon*), *Staphylococcus aureus* (*S. aure*) and *Bacillus subtilis* (*B. subt*)<sup>22-37</sup>.

147 The data were processed and annotated as outlined in the Methods, using standard pipelines  
148 and publicly available software. In addition, we downloaded standard operon predictions by  
149 finding common operon calls between MicrobesOnline and ProOpDB where available<sup>11,12</sup>.  
150 Operon predictions from these online tools agreed to a high degree (83% agreement), and  
151 therefore, we chose the MicrobesOnline prediction as ground truth for operon structure, as this  
152 database had the largest number of organisms. We chose not to combine existing operon calls  
153 for *E. coli* since that would skew the accuracy of *E. coli* over other organisms and therefore the  
154 skew the trained models.

155

156 We performed a correlation analysis between pairs of genes in an operon (gene A and  
157 gene B with intermediate region I) and a number of important features from Kruskal-Wallis (KW)  
158 analysis of the RNA-seq data (Figure 2). The features used were: Kruskal-Wallis statistic and  
159 Kruskal-Wallis p-value (all 2-way comparisons plus the 3-way comparison) and intergenic  
160 distance. A large KW statistic represents a large difference in signal between the groups being  
161 compared, and a small p-value indicates that this difference is significant. Using the 2-way and 3-  
162 way comparisons, we get 8 dimensions of information, and while it is possible that each of these  
163 is uniquely impactful in defining an operon, we acknowledge that some of them may be related  
164 (eg. the 3-way comparison is likely to correlate with individual 2-way comparisons). Nevertheless,  
165 we include all these parameters in our analysis to maximize information use. We used a log10  
166 transformation for the KW p-values to improve resolution. As expected, the length of genes A  
167 and B do not correlate with operon structure, and as previously reported<sup>20,21,38,39</sup>, intergenic  
168 distance correlates negatively with likelihood of an operon pair (Figure 2). In terms of gene  
169 expression, the KW statistic correlates negatively with operon pair likelihood, and the log value  
170 of the KW p-value correlates positively (Figure 2). Despite RNA-seq data coming from different  
171 organisms and disparate sources, we find that the KW statistic and p-value have a higher  
172 correlation with operon pairs than intergenic distance, highlighting the importance of the  
173 information coming from RNA-seq across species. In addition, metrics that assay RNA-seq  
174 coverage of the intergenic region are the most predictive of operon pairs as expected. However,  
175 no single data point had a higher than 50% correlation, suggesting that inferring a direct linear

176 relationship between any features and the outcome of being in an operon would be too  
177 simplistic, therefore requiring a more complex model.

178

179 *Operon-SEQer improves recall and specificity for operon prediction*

180

181 To improve operon prediction from RNA-seq data, we used intergenic length, KW statistics, and  
182 KW p-values as features for machine learning. We tested a range of classification algorithms that  
183 have previously been used in similar applications: logistic regression (LR), support vector machine  
184 (SVM, using the radial basis function which we determined to perform better than the linear,  
185 sigmoid or polynomial kernels), random forest (RF), XGBoost (XGB) and Gaussian Naïve Bayes  
186 (GNB). We used all of the data sets outlined in the methods and initially validated the various  
187 models using 50 random bootstraps of 75% of the data for training and 25% of the data for  
188 validation<sup>40-43</sup>. Recall and specificity served as measures of success to match previous reports<sup>10,14</sup>.  
189 As we are aiming for a species- and gene-agnostic method, these results are an aggregate of all  
190 the species and data sets that we included in our analysis.

191

192 While there was some trade-off between recall and specificity, all algorithms performed with  
193 both recall and specificity of at least 80% (Figure 2b). In particular, the tree-based methods (i.e.  
194 RF and XGB) had the best performance, with XGBoost having almost perfect recall and specificity  
195 in this validation set. We then conducted an independent test of our program to truly understand  
196 the broad applicability of our algorithms. We downloaded new RNA-seq data sets from *E.coli* and  
197 *B. subtilis*, organisms that were represented in the training data (but this new data is unseen by  
198 the algorithm), as well as RNA-seq data sets from *Mycobacterium tuberculosis* (*M. tuberculosis*)  
199 and *Pseudomonas syringiae* (*P. syringiae*), organisms (and data) absent from the training data<sup>40-</sup>  
200 <sup>43</sup>. We compared operon calls from our algorithms using these new, unseen data sets against  
201 operon annotations from MicrobesOnline. To get a confidence interval for our calls, we sub-  
202 sampled 10% of the data with replacement over 100 iterations for each algorithm. These results  
203 are plotted along with 95% confidence intervals in Figure 3. There was a range of performance  
204 depending on the algorithm used. The GNB and MLP algorithms, for the most part, had higher

205 specificity compared with recall, which suggests that these methods are preferable for  
206 conservative operon calls. Ideally, however, we want to capture the largest number of operons.  
207 The logistic regression, SVM and tree-based methods (RF and XGB) have higher recall compared  
208 with specificity, which allows for a more complete annotation of operons but raises the concern  
209 of potential false-positive results. All results were confirmed by plotting receiver operating  
210 characteristics (ROC) curves (Sup. Figure 1). The higher recall and slightly lower specificity brings  
211 up the question of whether there may be some operons called by Operon-SEQer that are not  
212 annotated in MicrobesOnline, which is used as the standard. The question is whether these truly  
213 are false-positives or whether we are discovering new operon pairs that have not yet been  
214 annotated. To determine if there was a bias in recall and specificity related to the depth and  
215 coverage of the sequencing data, we analyzed the *M. tuberculosis* data since the various  
216 experiments had a large range of sequencing depth (Sup. Figure 2). We found no correlation of  
217 total reads, total mapped reads and percent mapped reads, with recall or specificity, suggesting  
218 that depth of sequencing is not limiting when using Operon-SEQer.

219  
220 We compared the Operon-SEQer results for *E. coli* and *B. subtilis* with two state-of-the-  
221 art methods for operon detection, DOOR and Rockhopper, to ensure that the flexibility of our  
222 method did not affect the performance relative to other methods<sup>10,14</sup>. For Operon-SEQer, we  
223 calculated the recall and specificity for operon calls that were confirmed by 1 – 6 of the algorithms  
224 in our method. In other words, we set cutoffs ranging from 1 to 6 for how many algorithms had  
225 to call an operon pair before it was considered a true result (Sup Figure 3). We found that overall,  
226 Operon-SEQer performs on-par or better than the state-of-the art methods. The heat map in Sup  
227 Figure 3 shows that with just one of the six algorithms required for calling an operon pair,  
228 Operon-SEQer has perfect recall for both organisms. There is an expected trade-off between  
229 recall and specificity, however, with the compromise point somewhere between 2 and 4  
230 algorithms, depending on the organism. This suggests that using 3 algorithms to call an operon  
231 pair is likely a good starting point.

232

233 *Operon-SEQer enables prediction of new operons*



234

235           Prior calculations of specificity assume that the operon structure provided by the  
236 standard, MicrobesOnline, is ground truth<sup>12</sup>. However, it is possible that the application of RNA-  
237 seq data enables prediction of new operons, previously missed by the standard. To address this  
238 issue of lower specificity versus novel operons, we sought to corroborate operon calls from  
239 Operon-SEQer using long-read PacBio SMRTseq transcriptomic data from *E. coli*<sup>7</sup>. In this prior  
240 study, a new set of previously unreported operons were discovered based on direct evidence of  
241 individual molecules of RNA spanning two genes. We separated the operon calls made by  
242 Operon-SEQer (using the different algorithms) in *E. coli* into four categories: (i) operon pairs  
243 called by neither SMRTseq nor the standard, (ii) operon pairs called by the standard only, (iii)  
244 operon pairs called by SMRTseq only, and (iv) operon pairs called by both. We then examined  
245 what proportion of the calls in these various groups were confirmed by Operon-SEQer. We used  
246 a threshold voting method by which cutoffs were designed based on how many Operon-SEQer  
247 algorithms identified an operon pair (1-6). When the SMRTseq data and standard agree, Operon-  
248 SEQer can identify a vast majority (>80%) of these operon pairs while requiring that 5/6  
249 algorithms call the operon pair, suggesting a high level of three-way agreement between the  
250 methods (Figure 4a). When both SMRTseq and the standard do not find an operon pair, no more  
251 than 10% of those get called as an operon pair by Operon-SEQer, even when that is only by 1/6  
252 algorithms. If we require a higher number of algorithms to call an operon pair, that percentage  
253 is in the single digits. Of note, when SMRTseq calls an operon pair not identified by the standard,  
254 at least one of our algorithms calls almost half of those operon pairs, suggesting that there are in  
255 fact operon pairs missed by the standard that can be predicted by Operon-SEQer (Figure 4a). We  
256 confirm this increase in specificity for each individual algorithm when looking at operon pairs  
257 with or without SMRTseq calls (Figure 4B). We note the lower recall (Figure 4b) and attribute this  
258 to lowly expressed gene pairs being called as operons in the SMRTseq experiment that our  
259 reliability cutoffs for short-read RNA-seq data likely miss.

260           Next, we looked at the specificity and recall of our method for operons that are called by  
261 the standard, by SMRTseq, or by either one. As expected, we see a trade-off between the  
262 specificity and the recall of all operon pairs as we increase the number of algorithms required to

263 call an operon pair in *E. coli* (Figure 4c), and this tradeoff exists with data sets for other organisms  
264 as well (Sup. Figure 3). Since the SMRTseq data represents only one experimental condition, we  
265 do not expect that all operon pairs will be detected with this data set, which is why our method  
266 shows lower specificity with SMRTseq-called pairs than with standard-called pairs (Figure 4c).  
267 Again, the lower recall with SMRTseq data suggests that some operon pairs with very low  
268 expression are detected with long-read sequencing but are difficult to detect with short-read  
269 sequencing. The specificity of Operon-SEQer is higher (especially at lower algorithm number  
270 cutoffs) when we consider all operon pairs called by either SMRTseq or the standard (Figure 4c).  
271 This suggests that Operon-SEQer is likely detecting operon pairs that are missed by traditional  
272 operon callers, which rely on sequence and conservation information, and that these operon  
273 pairs can be identified using RNA-seq data. A similar result was demonstrated by the authors of  
274 Rockhopper, where they show that some of the operons Rockhopper detects that are not called  
275 by the standard can be confirmed by RT-qPCR<sup>14</sup>. Here, we show this on a global scale using long-  
276 read sequencing data, and we only require a single experimental condition to achieve this (as  
277 opposed to a comparison of two experimental conditions).

278  
279 While Operon-SEQer allows for calls from a single experiment, and all our data until now  
280 is representative of operon pair calls based on a single RNA-seq result for each gene pair, we  
281 tested whether we could use the incidence of RNA-seq replicates (either biological replicates of  
282 a single condition or multiple experimental conditions) to strengthen our predictions. We  
283 therefore focused only on gene pairs that had data in at least 2 instances of data (i.e. crossed  
284 expression thresholds at least twice) and required agreement between the two replicates to  
285 make a final call. Replicate agreement was defined as the operon call made for each replicate  
286 being the same within an algorithm. We see that requiring two or more calls in agreement  
287 drastically improves the recall and specificity for all our comparisons (Figure 4d. Specifically,  
288 when we look at operon pairs that are called by either the standard or SMRTseq (solid line in  
289 Figure 4d), having even a single algorithm in our set of algorithms call the operon pair ensures a  
290 specificity of 96% and a recall of almost 90%, demonstrating that replicates significantly improved  
291 the performance of our program without requiring more training.

292

## 293 **Discussion**

294       The emergence of long-read sequencing data has shown us that the discovery of operons  
295 in prokaryotes is far from complete. In fact, there are many nuances to operon structure,  
296 including modular transcription terminators, that lead to combinations of operons that are  
297 difficult to predict based solely on sequence and conservation<sup>7</sup>. While long-read RNA-sequencing  
298 is an effective way to address this gap, the limitation with this approach is the need for a wide  
299 range of experimental conditions to ensure capture of all operon pairs, which can be time-  
300 consuming and costly. As an alternative, we have demonstrated here that the abundance of  
301 short-read RNA-sequencing data that has been accumulated of these past decades can be used  
302 to discover operon pairs. We show that by using an set of algorithms, we can call operon pairs  
303 using short-read sequencing data from a range of organisms with high recall and specificity. In  
304 addition, we demonstrate that it is likely that we are identifying non-annotated operon pairs  
305 using this method, based on confirmation by long-read sequencing data (ref).

306

307       Our approach uses a set of algorithms and a threshold voting system, as we found the  
308 results both more robust and more flexible compared to individual algorithms. While there are  
309 advantages and disadvantages to each approach, the threshold voting system can provide some  
310 level of confidence in the call and allows the user to decide whether recall or specificity is more  
311 important for their particular needs. An example of an ensemble operon caller is CONDOP, which  
312 also uses RNA-seq for determining operon gene pairs<sup>18</sup>. The main distinction with our method is  
313 that CONDOP requires annotated operons from the DOOR database and outputs a list of  
314 condition-specific operons using RNA-seq data based on this previous annotation, while Operon-  
315 SEQer does *de novo* operon detection using only RNA-seq data and intergenic distance as  
316 inputs<sup>18</sup>. We also improve on the methods used by rSeqTU by incorporating a statistical front-  
317 end to allow for more variability across organisms and data sets, and we also use a wide range of  
318 training data, as well as multiple ML models and a voting system<sup>15</sup>. We also provide the code  
319 required to re-train our models as data acquisition evolves and novel sequencing data types  
320 emerge, which given the statistical front-end transformation, should be broadly applicable. Other

321 applications in genomics where ensemble methods have proven very useful include annotation  
322 of genomic islands, detection of genomic mutations, and gene expression-based phenotype  
323 prediction<sup>44-47</sup>. The development of these flexible methods is critical for weathering the natural  
324 and technical variation between organisms and data sets, which we can see even between the  
325 data sets that we chose to analyze in this study. In addition to flexibility, generalizability has long  
326 been an issue with operon calling, with training data often dictating the subset of organisms that  
327 can be tested using an algorithm. Our approach circumvents this by taking a gene-agnostic,  
328 function-agnostic approach, while simultaneously transforming the data into a statistic and p-  
329 value. This allowed Operon-SEQer to make calls on organisms and data sets that were unseen  
330 during testing with high recall and specificity. In addition, the algorithm can be trained with  
331 additional data sets as RNA-seq technology evolves, highlighting the longevity of such an  
332 approach.

333

334 Operon-SEQer has the potential to identify unannotated operon gene pairs that are  
335 confirmed by long-read RNA-seq data. This suggests that there are still a number of design rules  
336 for operon structure in bacteria that remain unknown, and Operon-SEQer can be used as a tool  
337 to discover these rules by marking novel operon pairs that are detected through RNA-sequencing  
338 but had not previously been identified. We can also ask which of these rules are organism-specific  
339 and which are general based on the results of our prediction. There has been a significant amount  
340 of work demonstrating that there are a number of dynamic and ever-evolving forces at play when  
341 it comes to operon structure, including RNA decay, overlapping transcription and previously  
342 uncharacterized functional relationships<sup>2,3,5,48</sup>. Using Operon-SEQer, we can survey the large  
343 amounts of RNA-seq data that are currently available through public repositories, and we can  
344 identify novel operons that can point to new or understudied functions of genes in any  
345 prokaryotic organism. Furthermore, since Operon-SEQer only requires a single experiment for  
346 operon calling, we can compare operon calls between conditions to see whether there are any  
347 changes in operon structure based on the state of the cells.

348

349 A future goal for Operon-SEQer is to incorporate long-read RNA-sequencing as the data  
350 becomes available. In fact, Operon-SEQer can be consolidated into a larger, modular algorithm  
351 that incorporates data from many information streams. It may also be interesting to adapt  
352 Operon-SEQer for transfer learning for this purpose, as it has been demonstrated that transfer  
353 learning can be useful in the generalizability of operon calling<sup>13</sup>. Importantly, our approach of  
354 using a statistical method to determine the similarity in expression of different regions of the  
355 genome in RNA-seq data, and then using the outputs of this method for machine learning can be  
356 applied broadly not only to prokaryotes, but also in understanding regulation of gene expression  
357 in higher organisms. Such an endeavor would complement the plethora of work that is currently  
358 ongoing in the field of machine learning for understanding gene regulation<sup>49-54</sup>. Ultimately, the  
359 key to fully unlocking the potential of machine learning in understanding gene regulation is likely  
360 to arise from a combination of computational approaches, with carefully curated and processed  
361 data, and methods such as Operon-SEQer can be used, adapted, and expanded upon to achieve  
362 this goal.

363

## 364 **Materials and Methods**

365

### 366 Data sets

367 For training Operon-SEQer, publicly available RNA-seq data were downloaded from  
368 Sequence Read Archive (SRA) for *Escherichia coli* (PRJNA274573, PRJNA436580 and  
369 PRJNA473128), *Bacillus subtilis* (PRJNA511580 and PRJNA555096), *Clostridium difficile*  
370 (PRJNA244679, PRJNA283975, PRJNA338449 and PRJNA217778), *Burkholderia pseudomallei*  
371 (PRJNA413621 and PRJNA312225), *Staphylococcus aureus* (PRJNA514046, PRJNA541911 and  
372 PRJNA546264), *Synechococcus elongatus PCC 7942* (PRJNA315938), *Synechocystis sp. PCC 6803*  
373 (PRJNA361291) and *Synechococcus sp. PCC 7002* (PRJNA310120, PRJNA361291 and  
374 PRJNA212552).

375 For testing Operon-SEQer, publicly available RNA-seq data were downloaded from SRA  
376 for *Escherichia coli* (PRJNA274573, PRJNA436580 and PRJNA473128), *Bacillus subtilis*

377 (PRJNA511580 and PRJNA555096), *Clostridium difficile* (PRJNA244679, PRJNA283975,  
378 PRJNA338449 and PRJNA217778), *Burkholderia pseudomallei* (PRJNA413621 and PRJNA312225)  
379

#### 380 Preparing, aligning, quantifying and annotating RNA-seq data

381 RNA-seq data was aligned with Hisat2, and bedtools genomecov was used to extract  
382 coverage across the genome<sup>55,56</sup>. A gff3 file corresponding to each organism being surveyed was  
383 downloaded from Ensembl Bacteria (<https://bacteria.ensembl.org/>) and filtered for genes only.  
384 Importantly, we next filtered the data for where the mean coverage across at least one gene  
385 from the pair of genes being compared is 10 reads, thereby eliminating gene pairs that are not  
386 expressed or where no conclusion can be reached. This is an important step in training the  
387 algorithm so that it recognizes true negatives and positives and is not side-tracked by regions  
388 that are not expressed and therefore cannot be used as predictors.

389 Following this, we collected pairwise coverage data for adjacent genes, as well as the  
390 intergenic region between these genes. With the 5' most gene referred to as gene A and the 3'  
391 most gene referred to as gene B, we extract coverage from the 3' 50 bp of gene A (or the whole  
392 gene if it is shorter than 50 bp), the central 50 bp of the intergenic region (or the whole intergenic  
393 region if it is shorter than 50bp), and the 5' 50bp of gene B (or the whole gene if it is shorter than  
394 50 bp). We performed a Kruskal-Wallis test on pairwise comparisons of coverage or a three-way  
395 comparison, and recorded the statistic and p-value associated with each test. These, along with  
396 the intergenic distance were used as input features for machine learning. Operon calls referred  
397 to as 'the standard' were downloaded from MicrobesOnline ([www.microbesonline.org/](http://www.microbesonline.org/)). Long-  
398 read SMRT-seq Pacbio data was obtained from [doi.org/10.1038/s41467-018-05997-6](https://doi.org/10.1038/s41467-018-05997-6).

399

#### 400 Operon-SEQer

401 Operon-SEQer is a set of models with a threshold voting system, and our code is publicly  
402 available at <https://github.com/sandialabs/OperonSEQer>. Briefly, we use the scikit-learn module  
403 of Python3 to implement the machine learning algorithms. Algorithms that were used include  
404 Logistic Regression with L2 ridge regularization (LR), Support Vector Machine with a RBF kernel

405 (SVM), Random Forest (RF), XGBoost (XGB), Multi-Layer Perceptron (MLP) and Gaussian Naïve  
 406 Bayes (GNB). Features were scaled for all algorithms except RF and XGB.

407 The downloaded data was processed as outlined above, and the following features were  
 408 used for machine learning: length of gene A, length of gene B, intergenic length, Kruskal-Wallis  
 409 statistics and p-values for pairwise and three-way comparison of gene A, gene B and intergenic  
 410 coverage (as outlined above), and strand match between gene A and B. The data were scaled (for  
 411 all relevant algorithms) using MinMaxScalar. Each algorithm’s hyperparameters were optimized  
 412 using Bayesian Optimization (using Gaussian Processes) from GPyOpt methods. The  
 413 hyperparameters for each algorithm are as follows:

414

415

| Algorithm                     | Categorical features          | Continuous features                                                                                           |
|-------------------------------|-------------------------------|---------------------------------------------------------------------------------------------------------------|
| <b>Logistic regression</b>    | Lasso vs ridge regularization | -                                                                                                             |
| <b>Random Forest</b>          | -                             | Minimum sample split, maximum depth, number of estimators (all integer)                                       |
| <b>Support Vector Machine</b> | Kernel                        | C (as applicable), gamma (as applicable)                                                                      |
| <b>XGBoost</b>                | -                             | Gamma, learning rate, number of estimators (integer)                                                          |
| <b>Gaussian Naïve Bayes</b>   | -                             | Variance smoothing                                                                                            |
| <b>Multilayer Perceptron</b>  | -                             | Alpha, Maximum iterations (integer), number of hidden layers (integer), number of neurons per layer (integer) |

416

417 For the MLP, we used adam as the solver and relu as the activation function. We used  
 418 only 10 iterations of optimization for all the methods (which we judged as sufficient given high  
 419 accuracy during optimization) but we provide the code, which can be modified and used to re-

420 optimize hyperparameters in parallel. For each iteration of the optimizer, the model with the  
421 current set of hyperparameters was cross-validated 10-fold and the average accuracy of these  
422 10 iterations was used as the metric to evaluate performance. Final validation recall and  
423 specificity shown in Table 1.

424 The model was then saved with the optimized hyperparameters, and new, unseen data  
425 from four organisms (two from which we had used alternative data for training, and two from  
426 which we had used no data) were used for testing the algorithms. Individual precision and recall  
427 values were recorded across each run, with the comparison being made to the ‘standard’ operons  
428 called by MicrobesOnline<sup>12</sup>. Results were reported as an average of 100 runs, with 95%  
429 confidence intervals. ROC curves and AUC (area under the curve) were calculated using scikit-  
430 learn. Calls for n (1-6) number of algorithms were made by tallying the number of times a gene  
431 pair got called.

432 Additional details for Operon-SEQer are available at  
433 <https://github.com/sandialabs/OperonSEQer>.

434

#### 435 ROC (receiving operating characteristic) curve analysis

436 The prediction probability for each Operon-SEQer algorithm was calculated in python using with  
437 predict\_proba function in scikit-learn. False positive and true positive rates were determined  
438 using the roc\_curve function across a range of probabilities from 0 to 1. AUC (area under the  
439 curve) score was determined using the roc\_auc\_score, with areas closer to 1 being closer to the  
440 ideal.

441

#### 442 **Acknowledgements**

443 We would like to thank Joshua Podlevsky and Chuck Smallwood for discussions and advice  
444 regarding this work, Drew Levin, Bernard Nguyen and Steven Verzi for critical review of the  
445 manuscript, and Cameron Kunstadt for testing and troubleshooting of the software package. This  
446 work was supported by the Laboratory Directed Research and Development program at Sandia  
447 National Laboratories, a multi-mission laboratory managed and operated by National Technology  
448 and Engineering Solutions of Sandia, LLC, a wholly owned subsidiary of Honeywell International,



449 Inc., for the U.S. Department of Energy's National Nuclear Security Administration under contract  
450 DE-NA0003525.

451

452 **Competing Interests**

453 The authors do not have any competing interests to report.

454

455 **Code availability**

456 OperonSEQer is available at <https://github.com/sandialabs/OperonSEQer>

457

458 **Figures**

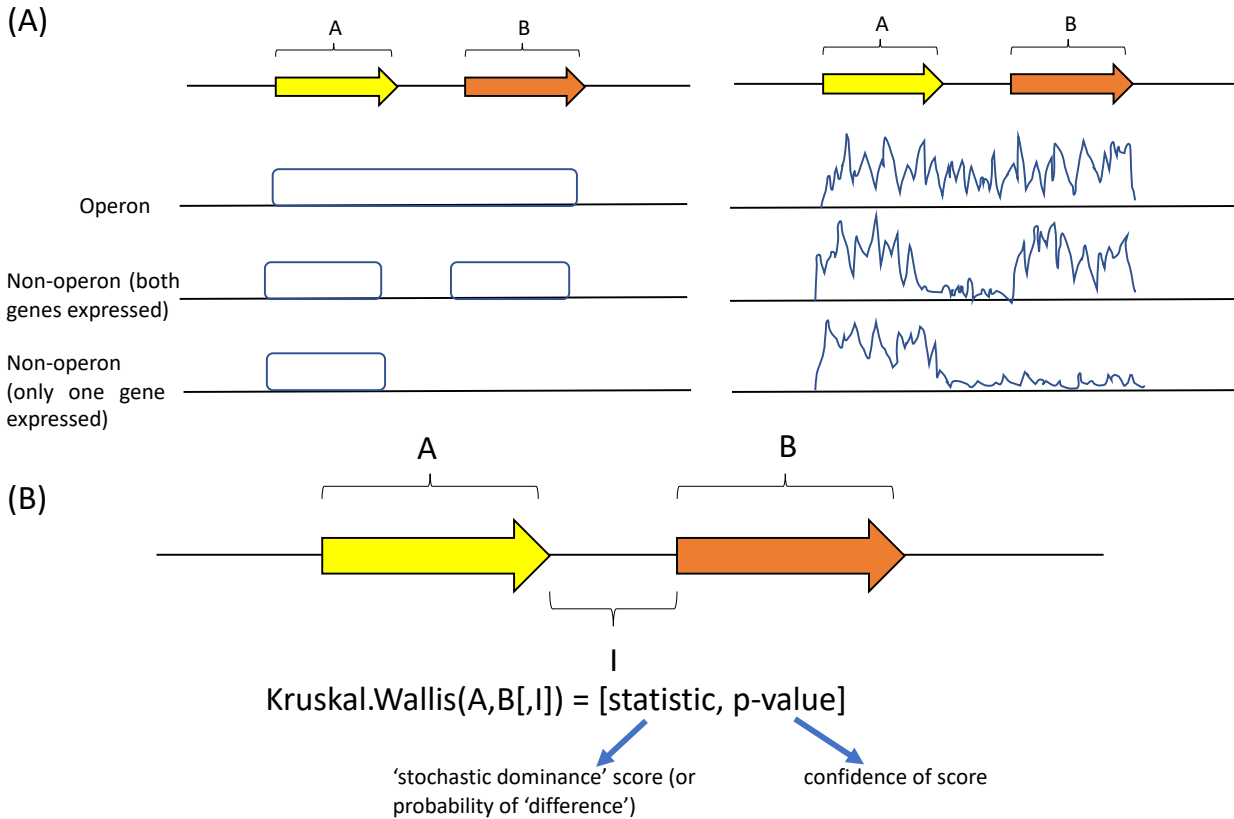

459  
460

461 **Figure 1 – Schematic of our method for determining similarity of RNA-seq signal between two**  
 462 **adjacent genes.** (A) Identification of an operon pair requires at least one of the two genes to be  
 463 detectably expressed, and significant signal in the intergenic space. Idealized data on the left, and  
 464 hypothetical real-world data on the right. (B) Usage of the Kruskal-Wallis statistic and p-value for  
 465 pairwise comparisons of genes A, B and the intergenic (I) region, as well as the 3-way comparison.  
 466 These values, along with the intergenic distance, serve as features for training our operon  
 467 prediction model.

468

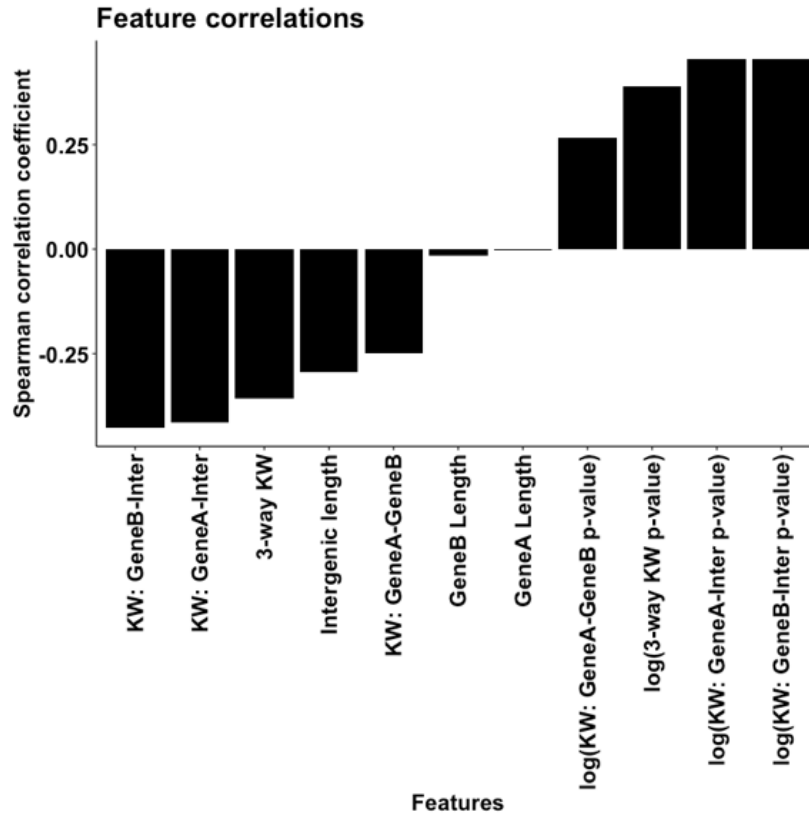

469

470

471 **Figure 2 – Operon-SEQer features and performance across the various algorithms used. (A)**

472 Spearman's correlation coefficients between the features considered for use in machine learning

473 and operon pair calls made by MicrobesOnline across 7-species (see main text). KW = Kruskal

474 Wallis statistic.

475

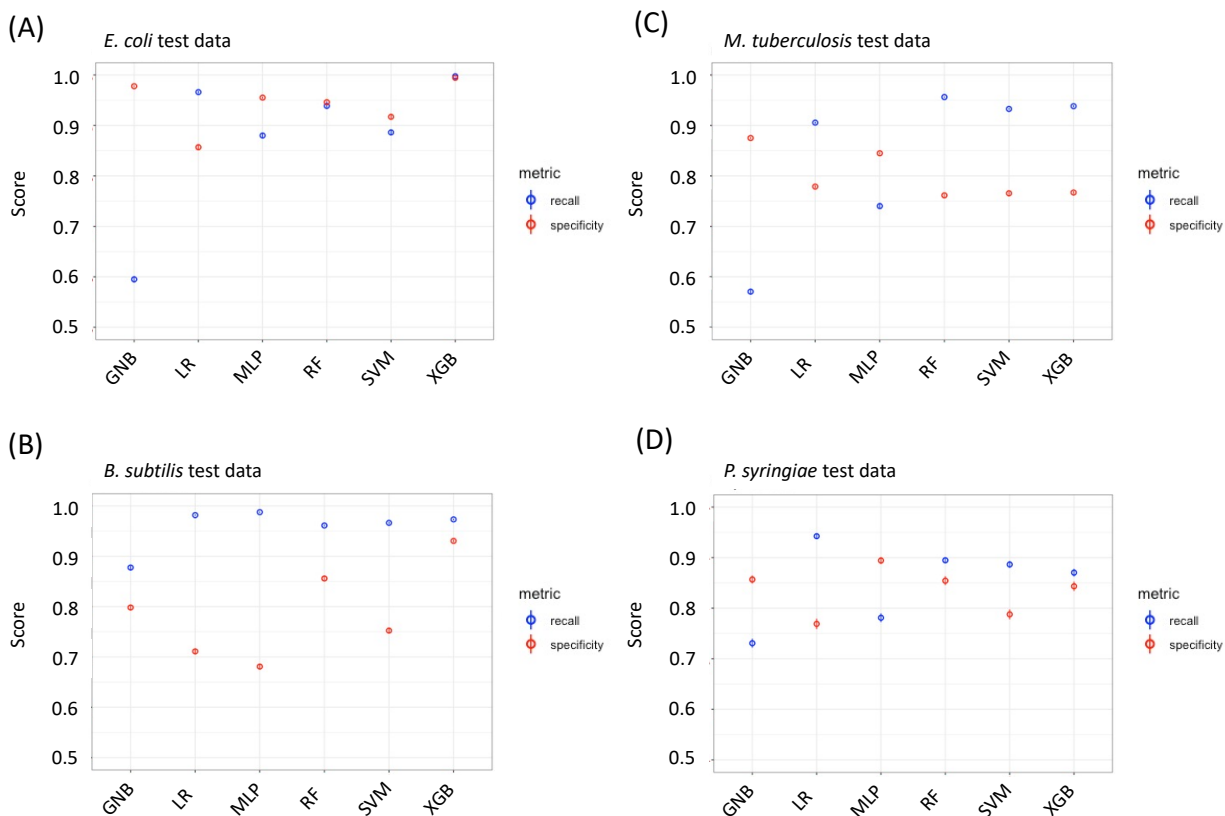

476

477 **Figure 3 – Operon-SEQer can identify operon pairs in new, unseen data.** Recall (blue) and  
478 specificity (red) for new data sets from (A) *E. coli*, (B) *B. subtilis*, (C) *M. tuberculosis*, and (D) *P.*  
479 *syringiae*. Mean numbers for 100 bootstrapped iterations are shown with 95% confidence  
480 intervals (central line in circle).

481

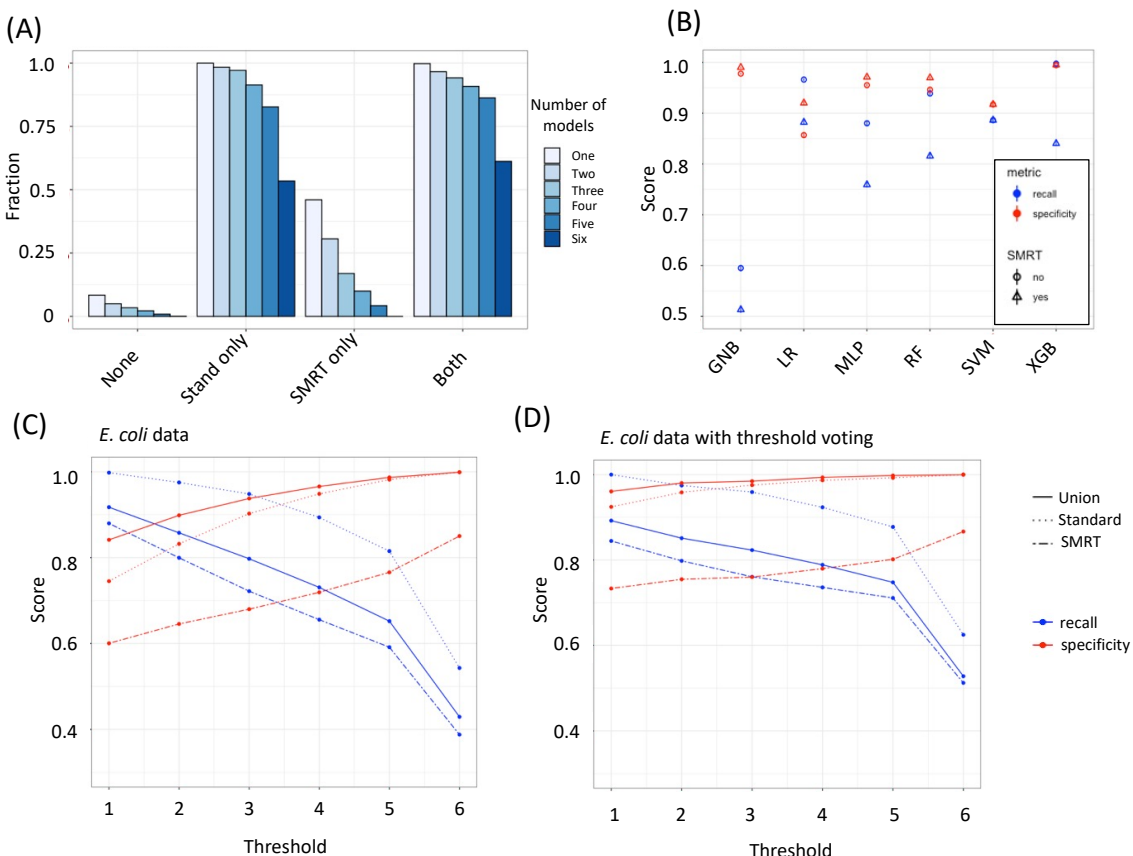

482

483 **Figure 4** – Operon-SEQer is best used as an ensemble of methods and finds operons not  
 484 annotated by the standard but detected by PACBIO SMRTseq. (A) Fraction of Operon-SEQer  
 485 operon pair calls that are confirmed by SMRTseq, the standard, neither, or both. Cutoffs for  
 486 Operon-SEQer operon calls are set at agreement of 1 – 6 algorithms within the ensemble. (B)  
 487 Recall (blue) and specificity (red) of individual algorithms within Operon-SEQer for operon calls  
 488 made only by the standard (circle) versus the standard plus SMRTseq calls (triangle). 95%  
 489 confidence intervals of 100-fold bootstraps are shown as lines within the shape. (C and D) Recall  
 490 (blue) and specificity (red) of the Operon-SEQer ensemble with algorithm agreement cutoffs of  
 491 1-6 for operon pair calls made by the standard (dotted lines), SMRTseq (dashed line), or by the  
 492 union of calls made by both (solid line); (C) represents all available operon pair data for the new  
 493 *E. coli* data sets and (D) represents operon pairs that have agreement between two or more  
 494 replicates.

495

496

| Algorithm                      | Recall | Specificity |
|--------------------------------|--------|-------------|
| Gaussian Naïve Bayes           | 0.95   | 0.80        |
| Logistic regression with ridge | 0.93   | 0.83        |
| Support Vector Machine - rbf   | 0.91   | 0.84        |
| Multi-layer Perceptron (ANN)   | 0.93   | 0.85        |
| Random Forest                  | 0.95   | 0.94        |
| XGBoost                        | 0.99   | 0.99        |

497

498

499 **Table 1-** Recall and specificity for the validation set for Operon-SEQer across six different  
500 algorithms. Heat map colors range from yellow (lowest) to white (mid-point) to blue (highest).

501

## 502 References

- 503 1 Bervoets, I. & Charlier, D. Diversity, versatility and complexity of bacterial gene regulation  
504 mechanisms: opportunities and drawbacks for applications in synthetic biology. *FEMS*  
505 *Microbiol Rev* **43**, 304-339, doi:10.1093/femsre/fuz001 (2019).
- 506 2 Bundalovic-Torma, C., Whitfield, G. B., Marmont, L. S., Howell, P. L. & Parkinson, J. A  
507 systematic pipeline for classifying bacterial operons reveals the evolutionary landscape of  
508 biofilm machineries. *PLoS Comput Biol* **16**, e1007721, doi:10.1371/journal.pcbi.1007721  
509 (2020).
- 510 3 Dar, D. & Sorek, R. Extensive reshaping of bacterial operons by programmed mRNA decay.  
511 *PLoS Genet* **14**, e1007354, doi:10.1371/journal.pgen.1007354 (2018).
- 512 4 Osbourn, A. E. & Field, B. Operons. *Cell Mol Life Sci* **66**, 3755-3775, doi:10.1007/s00018-  
513 009-0114-3 (2009).
- 514 5 Saenz-Lahoya, S. *et al.* Noncontiguous operon is a genetic organization for coordinating  
515 bacterial gene expression. *Proc Natl Acad Sci U S A* **116**, 1733-1738,  
516 doi:10.1073/pnas.1812746116 (2019).
- 517 6 Jacob, F., Perrin, D., Sanchez, C. & Monod, J. [Operon: a group of genes with the  
518 expression coordinated by an operator]. *C R Hebd Seances Acad Sci* **250**, 1727-1729  
519 (1960).
- 520 7 Yan, B., Boitano, M., Clark, T. A. & Ettwiller, L. SMRT-Cappable-seq reveals complex  
521 operon variants in bacteria. *Nat Commun* **9**, 3676, doi:10.1038/s41467-018-05997-6  
522 (2018).
- 523 8 Conway, T. *et al.* Unprecedented high-resolution view of bacterial operon architecture  
524 revealed by RNA sequencing. *mBio* **5**, e01442-01414, doi:10.1128/mBio.01442-14 (2014).
- 525 9 Taboada, B., Estrada, K., Ciria, R. & Merino, E. Operon-mapper: a web server for precise  
526 operon identification in bacterial and archaeal genomes. *Bioinformatics* **34**, 4118-4120,  
527 doi:10.1093/bioinformatics/bty496 (2018).
- 528 10 Mao, X. *et al.* DOOR 2.0: presenting operons and their functions through dynamic and  
529 integrated views. *Nucleic Acids Res* **42**, D654-659, doi:10.1093/nar/gkt1048 (2014).

- 530 11 Taboada, B., Ciria, R., Martinez-Guerrero, C. E. & Merino, E. ProOpDB: Prokaryotic Operon  
531 DataBase. *Nucleic Acids Res* **40**, D627-631, doi:10.1093/nar/gkr1020 (2012).
- 532 12 Dehal, P. S. *et al.* MicrobesOnline: an integrated portal for comparative and functional  
533 genomics. *Nucleic Acids Res* **38**, D396-400, doi:10.1093/nar/gkp919 (2010).
- 534 13 Assaf, R., Xia, F. & Stevens, R. Detecting operons in bacterial genomes via visual  
535 representation learning. *Sci Rep* **11**, 2124, doi:10.1038/s41598-021-81169-9 (2021).
- 536 14 Tjaden, B. A computational system for identifying operons based on RNA-seq data.  
537 *Methods* **176**, 62-70, doi:10.1016/j.ymeth.2019.03.026 (2020).
- 538 15 Niu, S. Y., Liu, B., Ma, Q. & Chou, W. C. rSeqTU-A Machine-Learning Based R Package for  
539 Prediction of Bacterial Transcription Units. *Front Genet* **10**, 374,  
540 doi:10.3389/fgene.2019.00374 (2019).
- 541 16 Fortino, V., Smolander, O. P., Auvinen, P., Tagliaferri, R. & Greco, D. Transcriptome  
542 dynamics-based operon prediction in prokaryotes. *BMC Bioinformatics* **15**, 145,  
543 doi:10.1186/1471-2105-15-145 (2014).
- 544 17 Price, M. N., Huang, K. H., Alm, E. J. & Arkin, A. P. A novel method for accurate operon  
545 predictions in all sequenced prokaryotes. *Nucleic Acids Res* **33**, 880-892,  
546 doi:10.1093/nar/gki232 (2005).
- 547 18 Fortino, V., Tagliaferri, R. & Greco, D. CONDOP: an R package for CONDition-Dependent  
548 Operon Predictions. *Bioinformatics* **32**, 3199-3200, doi:10.1093/bioinformatics/btw330  
549 (2016).
- 550 19 Zaidi, S. S. A. & Zhang, X. Computational operon prediction in whole-genomes and  
551 metagenomes. *Brief Funct Genomics* **16**, 181-193, doi:10.1093/bfgp/elw034 (2017).
- 552 20 Salgado, H., Moreno-Hagelsieb, G., Smith, T. F. & Collado-Vides, J. Operons in Escherichia  
553 coli: genomic analyses and predictions. *Proc Natl Acad Sci U S A* **97**, 6652-6657,  
554 doi:10.1073/pnas.110147297 (2000).
- 555 21 Okuda, S. *et al.* Characterization of relationships between transcriptional units and  
556 operon structures in *Bacillus subtilis* and *Escherichia coli*. *BMC Genomics* **8**, 48,  
557 doi:10.1186/1471-2164-8-48 (2007).



- 558 22 Lazar Adler, N. R. *et al.* Perturbation of the two-component signal transduction system,  
559 BprRS, results in attenuated virulence and motility defects in Burkholderia pseudomallei.  
560 *BMC Genomics* **17**, 331, doi:10.1186/s12864-016-2668-4 (2016).
- 561 23 Camara-Almiron, J. *et al.* Dual functionality of the amyloid protein TasA in Bacillus  
562 physiology and fitness on the phylloplane. *Nat Commun* **11**, 1859, doi:10.1038/s41467-  
563 020-15758-z (2020).
- 564 24 Kim, D. *et al.* Systems assessment of transcriptional regulation on central carbon  
565 metabolism by Cra and CRP. *Nucleic Acids Res* **46**, 2901-2917, doi:10.1093/nar/gky069  
566 (2018).
- 567 25 Payne, S. R. *et al.* Inhibition of Bacterial Gene Transcription with an RpoN-Based Stapled  
568 Peptide. *Cell Chem Biol* **25**, 1059-1066 e1054, doi:10.1016/j.chembiol.2018.05.007  
569 (2018).
- 570 26 Guyet, A. *et al.* Mild hydrostatic pressure triggers oxidative responses in Escherichia coli.  
571 *PLoS One* **13**, e0200660, doi:10.1371/journal.pone.0200660 (2018).
- 572 27 Burton, A. T., DeLoughery, A., Li, G. W. & Kearns, D. B. Transcriptional Regulation and  
573 Mechanism of SigN (ZpdN), a pBS32-Encoded Sigma Factor in Bacillus subtilis. *mBio* **10**,  
574 doi:10.1128/mBio.01899-19 (2019).
- 575 28 Sekulovic, O. & Fortier, L. C. Global transcriptional response of Clostridium difficile  
576 carrying the CD38 prophage. *Appl Environ Microbiol* **81**, 1364-1374,  
577 doi:10.1128/AEM.03656-14 (2015).
- 578 29 Maldarelli, G. A. *et al.* Type IV pili promote early biofilm formation by Clostridium difficile.  
579 *Pathog Dis* **74**, doi:10.1093/femspd/ftw061 (2016).
- 580 30 Girinathan, B. P. *et al.* Effect of tcdR Mutation on Sporulation in the Epidemic Clostridium  
581 difficile Strain R20291. *mSphere* **2**, doi:10.1128/mSphere.00383-16 (2017).
- 582 31 Scaria, J. *et al.* Differential stress transcriptome landscape of historic and recently  
583 emerged hypervirulent strains of Clostridium difficile strains determined using RNA-seq.  
584 *PLoS One* **8**, e78489, doi:10.1371/journal.pone.0078489 (2013).

- 585 32 Goncheva, M. I. *et al.* Stress-induced inactivation of the *Staphylococcus aureus* purine  
586 biosynthesis repressor leads to hypervirulence. *Nat Commun* **10**, 775,  
587 doi:10.1038/s41467-019-08724-x (2019).
- 588 33 Crosby, H. A. *et al.* The *Staphylococcus aureus* ArlRS two-component system regulates  
589 virulence factor expression through MgrA. *Mol Microbiol* **113**, 103-122,  
590 doi:10.1111/mmi.14404 (2020).
- 591 34 Sause, W. E. *et al.* The purine biosynthesis regulator PurR moonlights as a virulence  
592 regulator in *Staphylococcus aureus*. *Proc Natl Acad Sci U S A* **116**, 13563-13572,  
593 doi:10.1073/pnas.1904280116 (2019).
- 594 35 Choi, S. Y. *et al.* Transcriptome landscape of *Synechococcus elongatus* PCC 7942 for  
595 nitrogen starvation responses using RNA-seq. *Sci Rep* **6**, 30584, doi:10.1038/srep30584  
596 (2016).
- 597 36 Lacey, R. F., Allen, C. J., Bakshi, A. & Binder, B. M. Ethylene causes transcriptomic changes  
598 in *Synechocystis* during phototaxis. *Plant Direct* **2**, e00048, doi:10.1002/pld3.48 (2018).
- 599 37 Begemann, M. B. *et al.* An organic acid based counter selection system for cyanobacteria.  
600 *PLoS One* **8**, e76594, doi:10.1371/journal.pone.0076594 (2013).
- 601 38 Dam, P., Olman, V., Harris, K., Su, Z. & Xu, Y. Operon prediction using both genome-  
602 specific and general genomic information. *Nucleic Acids Res* **35**, 288-298,  
603 doi:10.1093/nar/gkl1018 (2007).
- 604 39 Edwards, M. T., Rison, S. C., Stoker, N. G. & Wernisch, L. A universally applicable method  
605 of operon map prediction on minimally annotated genomes using conserved genomic  
606 context. *Nucleic Acids Res* **33**, 3253-3262, doi:10.1093/nar/gki634 (2005).
- 607 40 Krogh, T. J., Franke, A., Moller-Jensen, J. & Kaleta, C. Elucidating the Influence of  
608 Chromosomal Architecture on Transcriptional Regulation in Prokaryotes - Observing  
609 Strong Local Effects of Nucleoid Structure on Gene Regulation. *Front Microbiol* **11**, 2002,  
610 doi:10.3389/fmicb.2020.02002 (2020).
- 611 41 Plocinski, P. *et al.* Proteomic and transcriptomic experiments reveal an essential role of  
612 RNA degradosome complexes in shaping the transcriptome of *Mycobacterium*  
613 *tuberculosis*. *Nucleic Acids Res* **47**, 5892-5905, doi:10.1093/nar/gkz251 (2019).

- 614 42 Nobori, T. *et al.* Transcriptome landscape of a bacterial pathogen under plant immunity.  
615 *Proc Natl Acad Sci U S A* **115**, E3055-E3064, doi:10.1073/pnas.1800529115 (2018).
- 616 43 Morrison, M. D., Fajardo-Cavazos, P. & Nicholson, W. L. Comparison of *Bacillus subtilis*  
617 transcriptome profiles from two separate missions to the International Space Station. *NPJ*  
618 *Microgravity* **5**, 1, doi:10.1038/s41526-018-0061-0 (2019).
- 619 44 Li, Y. L., Y. Performance-weighted-voting model: an ensemble machine learning method  
620 for cancer type classification using whole-exome sequencing mutation. *Quantitative*  
621 *Biology* **8**, 347-358, doi:<https://doi.org/10.1007/s40484-020-0226-1> (2020).
- 622 45 Jubair, S. D., M. in *IEEE International Conference on Bioinformatics and Biomedicine*  
623 *(BIBM)* (2019).
- 624 46 Wang, C. W. in *Proceedings of the 28th IEEE - EMBS Annual International Conference*  
625 (New York, NY, USA, 2006).
- 626 47 Abdollahi-Arpanahi, R., Gianola, D. & Penagaricano, F. Deep learning versus parametric  
627 and ensemble methods for genomic prediction of complex phenotypes. *Genet Sel Evol* **52**,  
628 12, doi:10.1186/s12711-020-00531-z (2020).
- 629 48 Tavormina, P. L., Orphan, V. J., Kalyuzhnaya, M. G., Jetten, M. S. & Klotz, M. G. A novel  
630 family of functional operons encoding methane/ammonia monooxygenase-related  
631 proteins in gammaproteobacterial methanotrophs. *Environ Microbiol Rep* **3**, 91-100,  
632 doi:10.1111/j.1758-2229.2010.00192.x (2011).
- 633 49 Song, Q. *et al.* Prediction of condition-specific regulatory genes using machine learning.  
634 *Nucleic Acids Res* **48**, e62, doi:10.1093/nar/gkaa264 (2020).
- 635 50 Agarwal, V. & Shendure, J. Predicting mRNA Abundance Directly from Genomic Sequence  
636 Using Deep Convolutional Neural Networks. *Cell Rep* **31**, 107663,  
637 doi:10.1016/j.celrep.2020.107663 (2020).
- 638 51 Yang, Y., Fang, Q. & Shen, H. B. Predicting gene regulatory interactions based on spatial  
639 gene expression data and deep learning. *PLoS Comput Biol* **15**, e1007324,  
640 doi:10.1371/journal.pcbi.1007324 (2019).

- 641 52 Piles, M. *et al.* Machine learning applied to transcriptomic data to identify genes  
642 associated with feed efficiency in pigs. *Genet Sel Evol* **51**, 10, doi:10.1186/s12711-019-  
643 0453-y (2019).
- 644 53 Yuan, Y. & Bar-Joseph, Z. Deep learning for inferring gene relationships from single-cell  
645 expression data. *Proc Natl Acad Sci U S A*, doi:10.1073/pnas.1911536116 (2019).
- 646 54 Wang, Y. *et al.* Using Machine Learning to Measure Relatedness Between Genes: A Multi-  
647 Features Model. *Sci Rep* **9**, 4192, doi:10.1038/s41598-019-40780-7 (2019).
- 648 55 Kim, D., Paggi, J. M., Park, C., Bennett, C. & Salzberg, S. L. Graph-based genome alignment  
649 and genotyping with HISAT2 and HISAT-genotype. *Nat Biotechnol* **37**, 907-915,  
650 doi:10.1038/s41587-019-0201-4 (2019).
- 651 56 Quinlan, A. R. & Hall, I. M. BEDTools: a flexible suite of utilities for comparing genomic  
652 features. *Bioinformatics* **26**, 841-842, doi:10.1093/bioinformatics/btq033 (2010).
- 653
- 654

655 **Supporting Information**

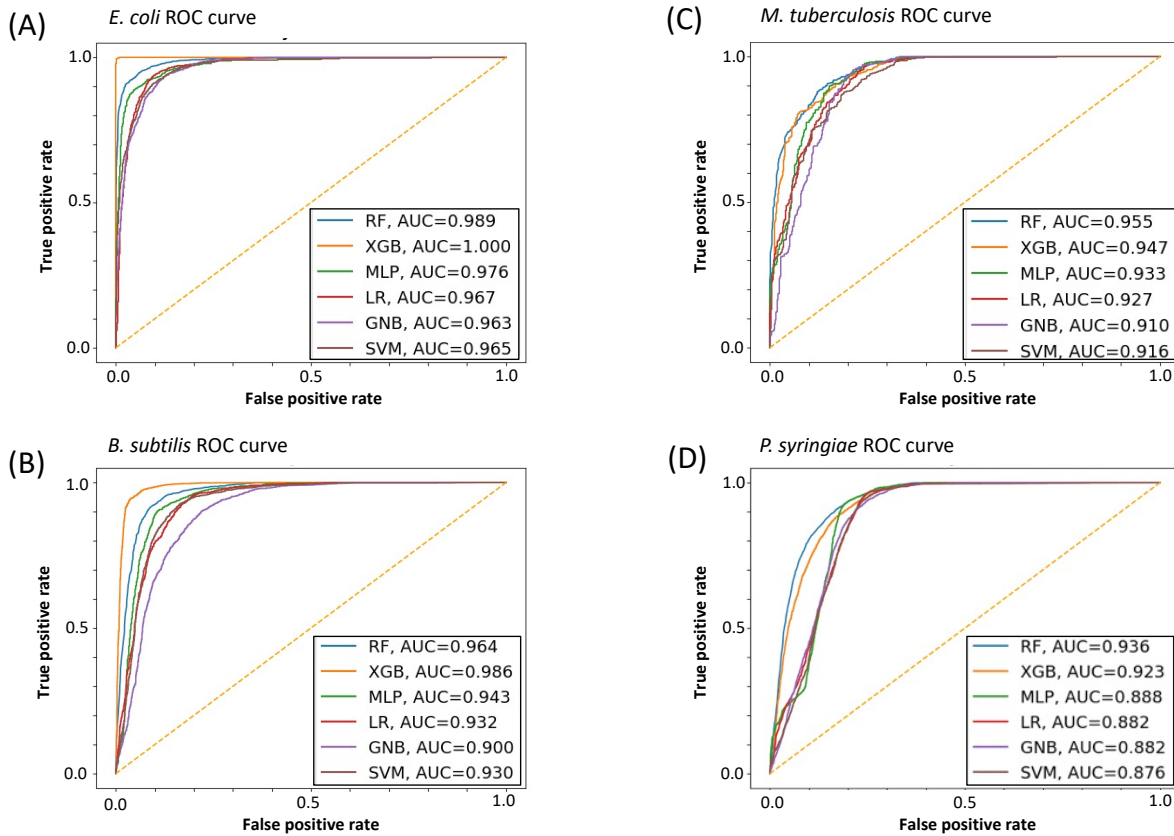

656

657 **Sup Figure 1 – ROC curves for Operon-SEQer performance.** ROC (receiver operating  
658 characteristics) curves, and AUC (area under the curve) for the 7 algorithms in Operon-SEQer for  
659 the (A) *E. coli*, (B) *B. subtilis*, (C) *M. tuberculosis*, and (D) *P. syringiae* data sets.

660

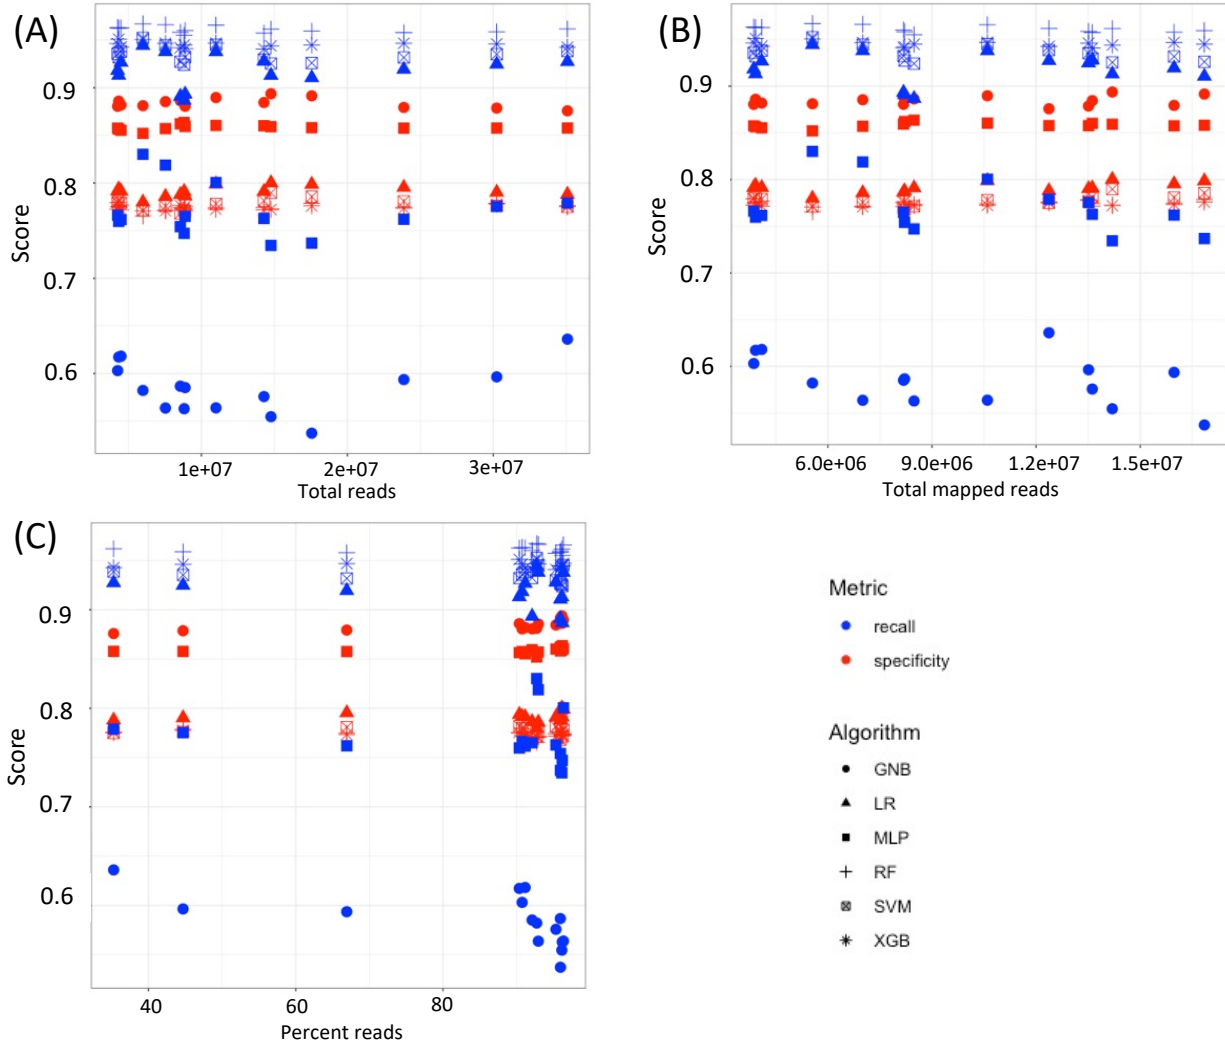

661

662 **Sup Figure 2 – Number of reads in a data set does not correlate with outcome of Operon-SEQer.**

663 Relationship between recall (blue) and specificity (red) of the 6 algorithms of Operon-SEQer for

664 (A) total reads, (B) total mapped reads, and (C) percent mapped reads in each data set from M.

665 tuberculosis (see Materials and Methods for accession numbers).

666

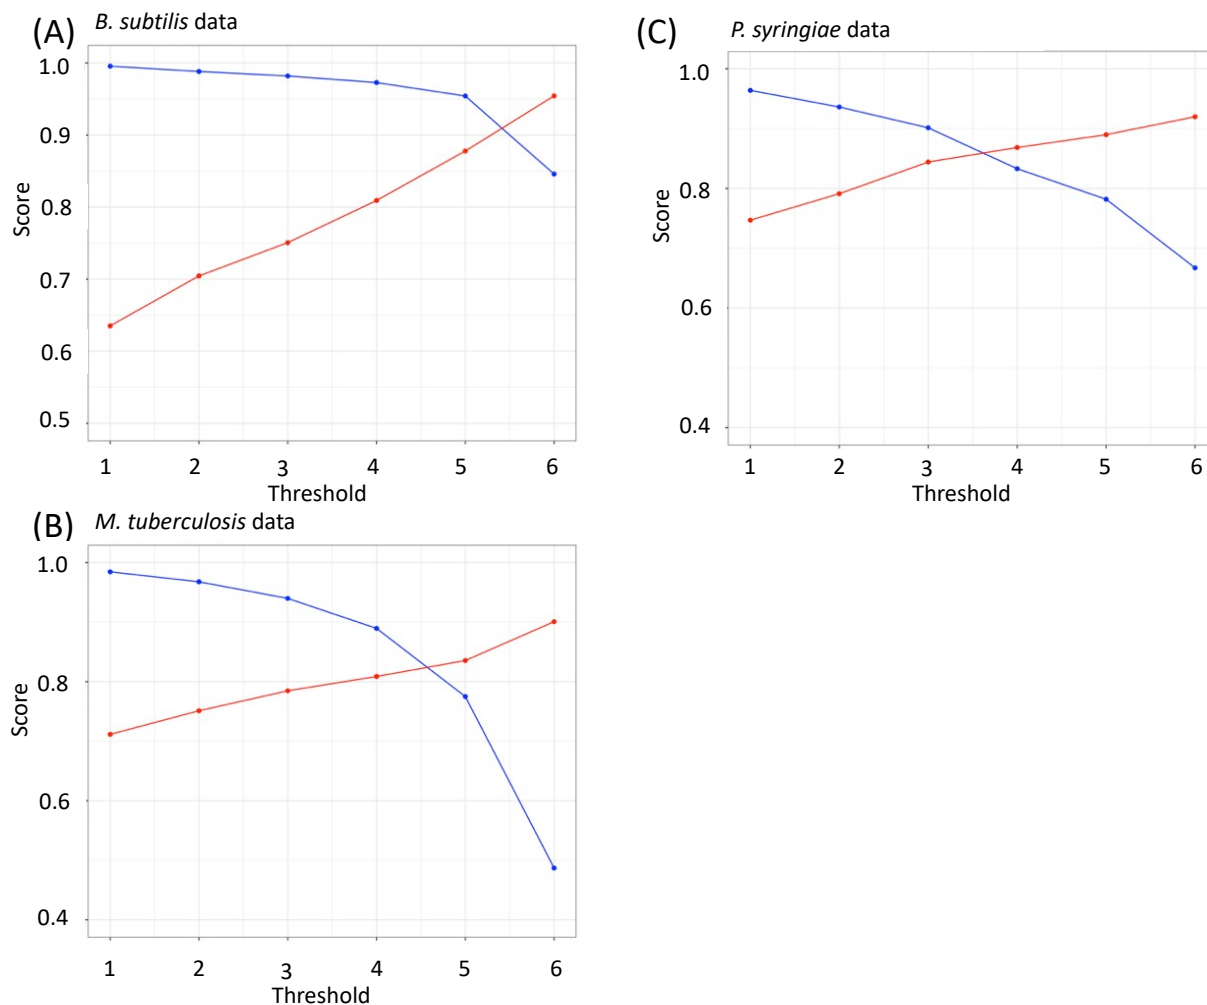

667

668 **Sup. Figure 3 – Operon-SEQer ensemble tested against new data sets.** Recall (blue) and

669 specificity (red) of the Operon-SEQer ensemble with algorithm agreement cutoffs of 1-6 for

670 operon pair calls for the new data set from (A) *B. subtilis*, (B) *M. tuberculosis*, and (C) *P. syringiae*.

671

|                | E. coli |             | B. subtilis |             |
|----------------|---------|-------------|-------------|-------------|
|                | Recall  | Specificity | Recall      | Specificity |
| DOOR           | 0.85    | 0.80        | 0.84        | 0.95        |
| Rockhopper     | 0.90    | 0.81        | 0.88        | 0.96        |
| Operon-SEQer 1 | 1.00    | 0.85        | 1.00        | 0.64        |
| Operon-SEQer 2 | 0.97    | 0.91        | 0.99        | 0.70        |
| Operon-SEQer 3 | 0.95    | 0.94        | 0.98        | 0.75        |
| Operon-SEQer 4 | 0.91    | 0.96        | 0.97        | 0.81        |
| Operon-SEQer 5 | 0.85    | 0.99        | 0.95        | 0.88        |
| Operon-SEQer 6 | 0.59    | 1.00        | 0.85        | 0.95        |

672

673

674 **Sup Table 1 – Comparison of Operon-SEQer with DOOR and Rockhopper.** Comparing the recall  
675 and specificity of DOOR and Rockhopper with the Operon-SEQer ensemble (with agreement of  
676 anywhere between 1 and 6 of the algorithms that make up Operon-SEQer being used to make  
677 operon pair calls). Heat map colors range from yellow (lowest) to white (mid-point) to blue  
678 (highest).
